# Supplementary material for: Patient-reported outcomes from a workplace intervention program for cancer survivors highlight ongoing needs to support continuation of work
Source: Springer Nature journal article supplement (doi:10.1007/s00520-019-04964-1), 2019-07-08
Supplement: MOESM3 [file 16907066]

### **Online Resource 3** Open-ended questions

#### Ensemble program users

1. What aspects of Ensemble were the most beneficial for you?
2. Describe how Ensemble impacted your work and/or overall health.
3. What specific suggestions do you have for the program improvement?

#### Ensemble program non-users

1. Please describe your most important needs related to working after a cancer diagnosis.
2. If a workplace program for cancer survivors was offered by your employer, what would be the most important services provided?
3. In your opinion, what would be the barriers to participation in a workplace program for cancer survivors?
