# Supplementary material for: Patient-reported outcomes from a workplace intervention program for cancer survivors highlight ongoing needs to support continuation of work
Source: Springer Nature journal article supplement (doi:10.1007/s00520-019-04964-1), 2019-07-08
Supplement: MOESM4 [file 16907066]

**Online Resource 4** Sampling and flow of study participation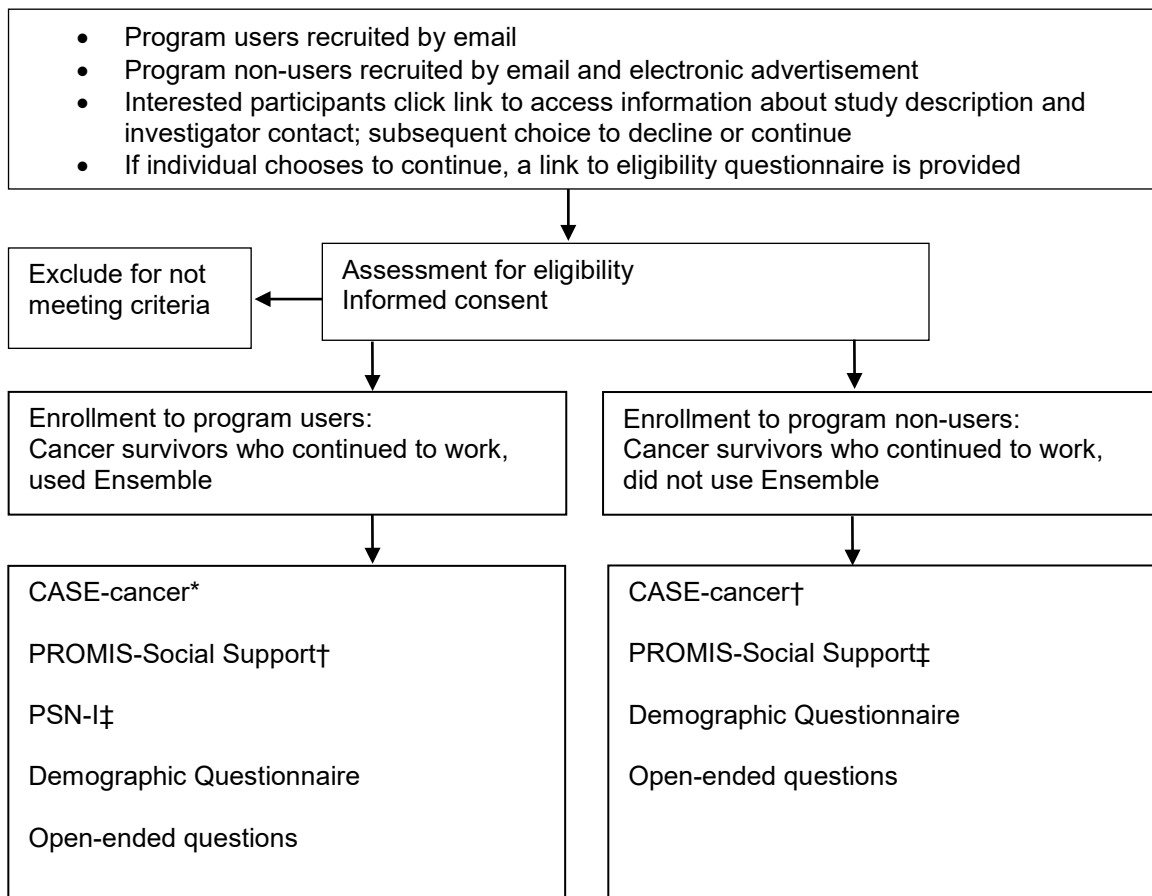

*CASE-cancer* Communication and Attitudinal Self-Efficacy for Cancer, *PROMIS* Patient-Reported Outcomes Measurement Information System, *PSN-I* Patient Satisfaction with Interpersonal Relationship with Navigator, *SD* standard deviation

\*Adapted from Wolf MS, Chang CH, Davis T, Makoul G (2005) Development and validation of the Communication and Attitudinal Self-Efficacy scale for cancer (CASE-cancer). *Patient Educ Couns* 57(3):333-341

†Adapted from Patient Reported Outcomes Measurement Information System (PROMIS) Domain framework- Social health (2014) <http://nihpromis.org/measures/domainframework3>

‡Adapted from Jean-Pierre P, Fiscella K, Winters PC, Post D, Wells KJ, McKoy JM, Battaglia T, Simon MA, Kilbourn K; Patient Navigation Research Program Group (2012) Psychometric development and reliability analysis of a patient satisfaction with interpersonal relationship with navigator measure: a multi-site patient navigation research program study. *Psychooncology* 21(9):986-992
