# Supplementary material for: Patient-reported outcomes from a workplace intervention program for cancer survivors highlight ongoing needs to support continuation of work
Source: Springer Nature journal article supplement (doi:10.1007/s00520-019-04964-1), 2019-07-08
Supplement: MOESM5 [file 16907066]

**Online Resource 5** The Cancer Survivorship and Work Model

Policies, procedures, and economic factors that may affect employment and return to work\*

| Factors Related to the Work Environment                                                                        | Factors Related to the Cancer Survivor                                                                                                                                                                                                                                                                                                                                                                                                                                                                                                                                                                                                                                                                                                                                                                            | Interventions and Rehabilitation Programs Promoting Return to Work and Employment                                                                                                                                                                                                                                                                     | Outcomes                                                                                                                                                                                                                                                                      |
|----------------------------------------------------------------------------------------------------------------|-------------------------------------------------------------------------------------------------------------------------------------------------------------------------------------------------------------------------------------------------------------------------------------------------------------------------------------------------------------------------------------------------------------------------------------------------------------------------------------------------------------------------------------------------------------------------------------------------------------------------------------------------------------------------------------------------------------------------------------------------------------------------------------------------------------------|-------------------------------------------------------------------------------------------------------------------------------------------------------------------------------------------------------------------------------------------------------------------------------------------------------------------------------------------------------|-------------------------------------------------------------------------------------------------------------------------------------------------------------------------------------------------------------------------------------------------------------------------------|
| Work conditions<br>Work demands<br>Employer accommodation<br>Work climate<br>Flexibility<br>Work gratification | <p><b>Individual and Interpersonal Factors</b></p> <ul style="list-style-type: none"> <li>• Sociodemographics</li> <li>• Socioeconomic status</li> <li>• Educational and Professional training</li> <li>• Life stage</li> <li>• Personality</li> <li>• Coping Strategies</li> <li>• Problem-solving skills</li> <li>• Motivation</li> <li>• Meaning of work</li> <li>• Social supports</li> </ul> <p><b>Short-term, long-term, and late effects of cancer and treatments</b></p> <ul style="list-style-type: none"> <li>• Health status/comorbidity</li> <li>• Continuity of care</li> <li>• Quality of life</li> <li>• Functional impairments</li> <li>• Symptom burden</li> <li>• Emotional and social well being</li> <li>• Change in identity and role functioning</li> <li>• Social reintegration</li> </ul> | <ul style="list-style-type: none"> <li>• Improvement of physical fitness and psychosocial functioning</li> <li>• Assessment and evaluation of work-related skills and work demands</li> <li>• Skills training (eg, job application training)</li> <li>• Occupational counseling and education</li> <li>• Employer education and counseling</li> </ul> | <ul style="list-style-type: none"> <li>• Employment/Return to work</li> <li>• Work ability</li> <li>• Work performance</li> <li>• Job opportunities</li> <li>• Income</li> <li>• Work satisfaction</li> <li>• Job promotion and training</li> <li>• Sustainability</li> </ul> |

\*Based on Mehnert A, de Boer A, Feuerstein M (2013) Employment challenges for cancer survivors. Cancer 119(Suppl 11):2151-2159
